# Supplementary material
Source: publisher figshare collection journal article supplement (https://karger.figshare.com/ndownloader/files/13001228)
Supplement: Supplementary file 1 [file 13001228]

| **Gene** | **Accession** | **Position** | **Tm CP** | **Tm RP** | **Tot isoforms** | **Hit** |
| --- | --- | --- | --- | --- | --- | --- |
| *Actb* | NM_007393.3 | 1139-1238 | 86 | 86 | 1 | 1 |
| *Adgre1* | NM_010130.1 | 996-1095 | 79 | 81 | 3 | 3 |
| *Aqp1* | NM_007472.1 | 2256-2355 | 82 | 80 | 1 | 1 |
| *B2m* | NM_009735.3 | 136-235 | 89 | 82 | 1 | 1 |
| *Bmp7* | NM_007557.2 | 691-790 | 82 | 81 | 1 | 1 |
| *Bmpr1a* | NM_009758.4 | 1791-1890 | 82 | 80 | 4 | 4 |
| *C5ar1* | NM_007577.3 | 596-695 | 83 | 82 | 2 | 2 |
| *Ccl2* | NM_011333.3 | 416-515 | 79 | 82 | 1 | 1 |
| *Ccl5* | NM_013653.1 | 166-265 | 82 | 79 | 1 | 1 |
| *Cd3d* | NM_013487.2 | 290-389 | 83 | 82 | 2 | 2 |
| *Col1a1* | NM_007742.3 | 216-315 | 82 | 81 | 1 | 1 |
| *Col3a1* | NM_009930.1 | 4371-4470 | 82 | 82 | 1 | 1 |
| *Col4a1* | NM_009931.2 | 4117-4216 | 82 | 82 | 3 | 3 |
| *Col5a3* | NM_016919.2 | 323-422 | 79 | 83 | 4 | 4 |
| *Elane* | NM_015779.2 | 492-591 | 83 | 82 | 1 | 1 |
| *Fn1* | NM_010233.1 | 2628-2727 | 81 | 83 | 13 | 13 |
| *Fth1* | NM_010239.1 | 447-546 | 85 | 85 | 2 | 2 |
| *Gapdh* | NM_008084.2 | 216-315 | 83 | 82 | 3 | 3 |
| *Grem1* | NM_011824.4 | 1086-1185 | 83 | 80 | 2 | 2 |
| *Gusb* | NM_010368.1 | 1736-1835 | 79 | 81 | 4 | 4 |
| *Hamp* | NM_032541.1 | 203-302 | 83 | 82 | 1 | 1 |
| *Havcr1* | NM_134248.2 | 116-215 | 81 | 79 | 7 | 7 |
| *Hprt* | NM_013556.2 | 31-130 | 82 | 82 | 1 | 1 |
| *Il1b* | NM_008361.3 | 1121-1220 | 82 | 80 | 2 | 2 |
| *Il6* | NM_031168.1 | 41-140 | 82 | 82 | 2 | 2 |
| *Itgam* | NM_001082960.1 | 3026-3125 | 80 | 82 | 2 | 2 |
| *Klf4* | NM_010637.3 | 2398-2497 | 82 | 82 | 1 | 1 |
| *Lcn2* | NM_008491.1 | 191-290 | 81 | 83 | 1 | 1 |
| *Mki67* | NM_001081117.2 | 1982-2081 | 80 | 82 | 4 | 4 |
| *Mmp9* | NM_013599.2 | 1571-1670 | 78 | 80 | 2 | 2 |
| *Mpo* | NM_010824.2 | 1649-1748 | 81 | 81 | 1 | 1 |
| *Nphs1* | NM_019459.2 | 382-481 | 85 | 85 | 2 | 2 |
| *Pdgfra* | NM_001083316.1 | 2521-2620 | 82 | 79 | 5 | 5 |
| *Pecam1* | NM_008816.2 | 1101-1200 | 82 | 80 | 9 | 9 |
| *Perp* | NM_022032.4 | 537-636 | 79 | 78 | 1 | 1 |
| *Ppia* | NM_008907.1 | 391-490 | 81 | 81 | 1 | 1 |
| *S100a4* | NM_011311.2 | 358-457 | 85 | 83 | 3 | 3 |
| *S100a8* | NM_013650.2 | 281-380 | 82 | 82 | 1 | 1 |
| *Scnn1a* | NM_011324.2 | 3071-3170 | 83 | 79 | 2 | 2 |
| *Serpine1* | NM_008871.2 | 1823-1922 | 84 | 79 | 1 | 1 |
| *Slc11a2* | NM_008732.1 | 466-565 | 82 | 81 | 8 | 7 |
| *Slc40a1* | NM_016917.2 | 1717-1816 | 79 | 79 | 3 | 3 |
| *Spp1* | NM_009263.3 | 421-520 | 83 | 81 | 5 | 5 |
| *Tgfbr2* | NM_009371.2 | 476-575 | 80 | 83 | 2 | 2 |
| *Thy1* | NM_009382.3 | 426-525 | 81 | 83 | 1 | 1 |
| *Tnf* | NM_013693.2 | 515-614 | 85 | 85 | 2 | 2 |
| *Trf* | NM_133977.2 | 1941-2040 | 79 | 83 | 1 | 1 |
| *Vcam1* | NM_011693.2 | 1441-1540 | 80 | 82 | 1 | 1 |
| *Vegfa* | NM_001025250.3 | 3016-3115 | 82 | 80 | 10 | 10 |
| *Wt1* | NM_144783.2 | 407-506 | 88 | 87 | 1 | 1 |

**Table S1: nCounter NanoString codeset design.** Gene name, corresponding GenBank accession numbers, Tm (melting temperature) for capture probe (CP) and reporter probe (RP), and total (tot) number of isoforms for the 50 genes included in the codeset are shown. Hit refers to the number of isoforms each probe pair targets.
